# Supplementary material
Source: ML conference proceedings conference paper supplement (https://openaccess.thecvf.com/content/CVPR2026/html/Yun_Vector_Prism_Animating_CVPR_2026_paper.html)
Supplement: Supplementary file 2 [file analysis_dbi.pdf › figures/analysis_dbi.pdf]

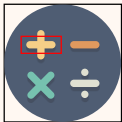

BBBox

$p = 0.9$

"Plus"

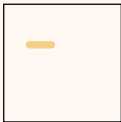

Isolation

$p = 0.1$

"Minus"

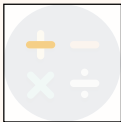

Highlight

$p = 0.1$

"Minus"

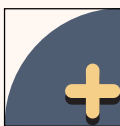

Zoom-in

$p = 0.5$

"Plus"

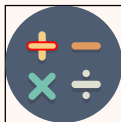

Outline

$p = 0.9$

"Plus"

## Majority voting

Decision: "Plus" (3/5)

The weakest reliable predictor ( $p = 0.5$  Zoom-in) becomes the swing vote.

## Ours

Decision: "Plus"  $\begin{cases} \text{Plus: } \log 9 + \log 9 + 0 \\ \text{Minus: } \log \frac{1}{9} + \log \frac{1}{9} \end{cases}$

Low reliability prediction are downweighted ( $\log \frac{1}{9}$  for  $p = 0.1$ ).
