# Supplementary material
Source: ML conference proceedings conference paper supplement (https://openaccess.thecvf.com/content/CVPR2026/html/Yun_Vector_Prism_Animating_CVPR_2026_paper.html)
Supplement: Supplementary file 3 [file analysis_failure.pdf › figures/analysis_failure.pdf]

## Instruction

"I want the lightning to blink twice and **shatter into pieces.**"

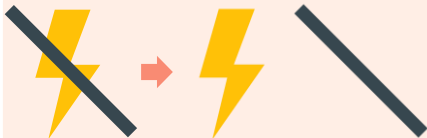

Input SVG

Primitive 1

Primitive 2

## SVG Code

```
<svg width="800px" height="800px" viewBox="0 0 14 14">  
  <path fill="#ffc107" d="M5.56354093 1.4148357L3.82576627  
7.49704701h2.49081035L4.9842827 13.0000001l4.63406576-  
6.66146953H6.89583484l1.8536263-4.92369487z"/>  
  <path fill="#37474f" d="M1.09244945 1.81907103L1.91152058  
12.9075506 11.99602994l-.81907112.81907112z"/>  
</svg>
```
