# Supplementary material
Source: ML conference proceedings conference paper supplement (https://openaccess.thecvf.com/content/CVPR2026/html/Yun_Vector_Prism_Animating_CVPR_2026_paper.html)
Supplement: Supplementary file 5 [file exp_noimage.pdf › figures/exp_noimage.pdf]

**Animation  
Failed**
