# Supplementary material
Source: ML conference proceedings conference paper supplement (https://openaccess.thecvf.com/content/CVPR2026/html/Yun_Vector_Prism_Animating_CVPR_2026_paper.html)
Supplement: Supplementary file 6 [file exp_user_study.pdf › figures/exp_user_study.pdf]

**79.2%**

**16.7%**

Ours vs. AniClipart

**66.9%**

**25.1%**

Ours vs. GPT-5

**76.5%**

**19.1%**

Ours vs. Wan 2.2

**63.3%**

**31.5%**

Ours vs. Sora 2
