# Supplementary material
Source: ML conference proceedings conference paper supplement (https://openaccess.thecvf.com/content/CVPR2026/html/Yun_Vector_Prism_Animating_CVPR_2026_paper.html)

## Original SVG

Fragmented parts ❌

Ambiguous tags ❌

Layer 1

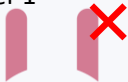

Layer 2

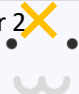

Layer 3

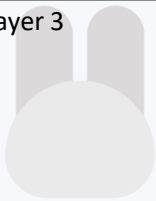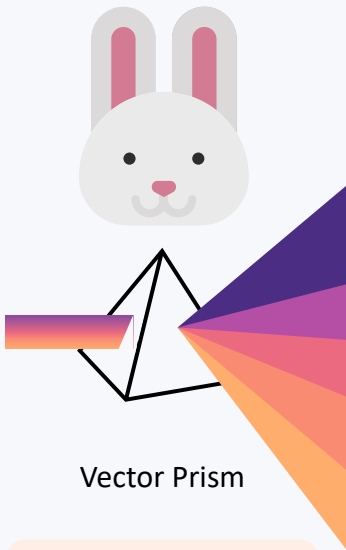

Vector Prism

### Instruction

"I want the bunny to blink its  
eyes and wiggle its nose"

## Structured SVG

Coherent parts ✓

Descriptive tags ✓

Ears

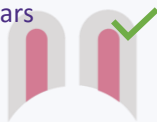

Eyes

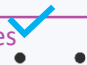

Nose

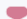

Mouth

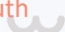

Head base

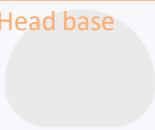

Supplement: Supplementary file 7 [file intro_groups.pdf › figures/intro_groups.pdf]
