# Supplementary material
Source: ML conference proceedings conference paper supplement (https://openaccess.thecvf.com/content/CVPR2026/html/Yun_Vector_Prism_Animating_CVPR_2026_paper.html)

**Input:** SVG file and instruction

**Output:** Animated SVG file

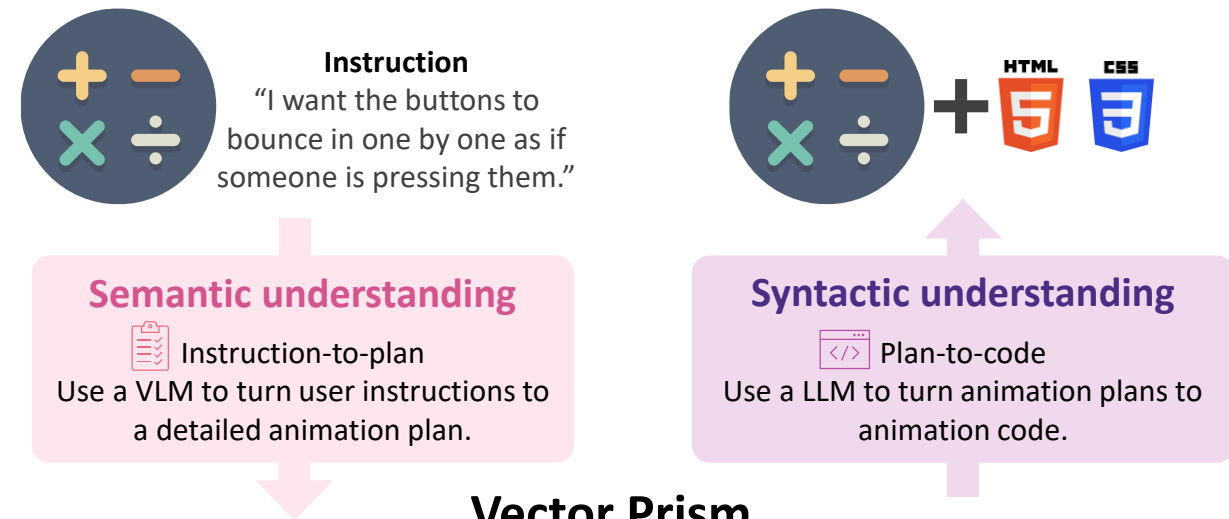

(a) Animation pipeline

**Burn-in stage**

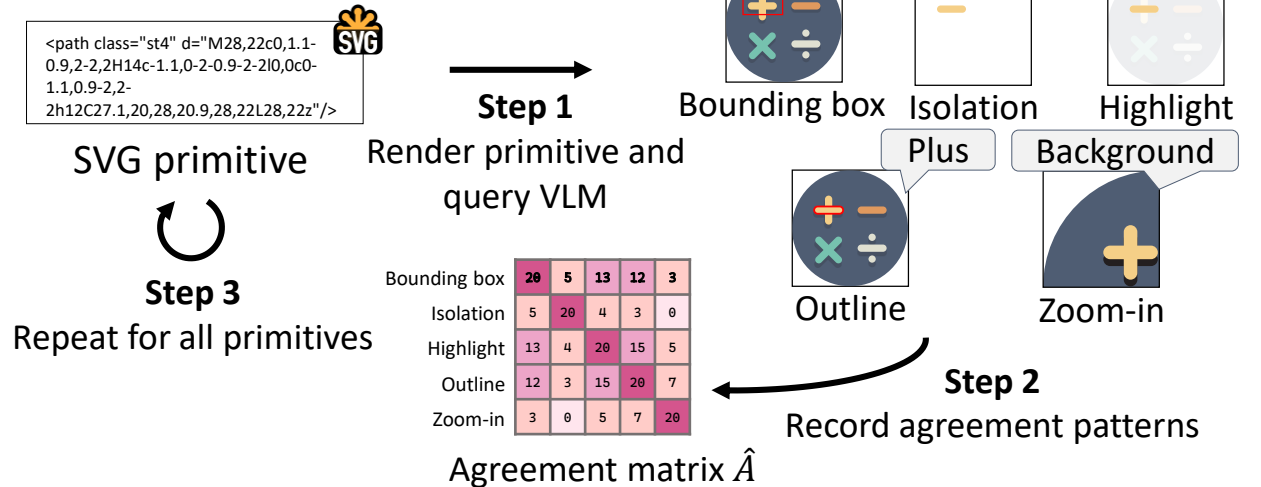

**Bayes decision stage**

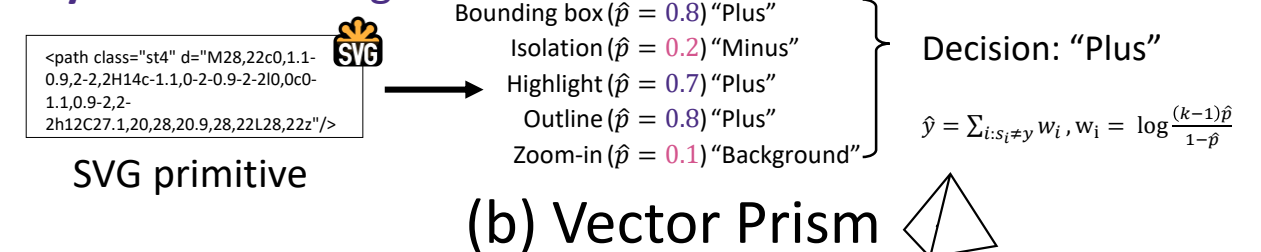

Supplement: Supplementary file 8 [file method_main.pdf › figures/method_main.pdf]
