# Supplementary material
Source: ML conference proceedings conference paper supplement (https://openaccess.thecvf.com/content/CVPR2026/html/Yun_Vector_Prism_Animating_CVPR_2026_paper.html)
Supplement: Supplementary file 9 [file supp_prompts0.pdf › figures/supp_prompts0.pdf]

You are evaluating whether a video matches a given text description.

Text Description: "{text\_prompt}"

Here are frames sampled from the video. Evaluate how well it depicts the given description.

Where the score represents:

- 90-100: Perfect match, video clearly depicts the description
- 70-89: Good match, most elements are present
- 50-69: Partial match, some elements are present
- 30-49: Weak match, few elements present
- 0-29: No match, video does not depict the description.

Provide your response in EXACTLY this json format:

```
```json
{
  "score": score_value,
  "reasoning": "brief explanation"
}
```

**GPT-T2V**
