# Supplementary material
Source: ML conference proceedings conference paper supplement (https://openaccess.thecvf.com/content/CVPR2026/html/Yun_Vector_Prism_Animating_CVPR_2026_paper.html)
Supplement: Supplementary file 10 [file supp_prompts1.pdf › figures/supp_prompts1.pdf]

This is an SVG image.

Your task is to generate animation plans for the individual elements in the image based on the following instruction:  
{instruction}

The goal is to create a **high-quality, smooth, and visually engaging SVG animation** suitable for web display.

Please follow these guidelines:

- **Animate elements individually or in thoughtfully grouped sets**. Each group should share similar motion or timing.
- **Avoid awkward or robotic movement** unless intentional. The animation should feel natural and dynamic.
- An element can be animated through changes in attributes like position, scale, rotation, color, opacity, path, etc.
- In case elements of similar type (e.g. trees, stars, clouds) is expected to have different animations, treat them as **distinct elements** (e.g., `left\_tree`, `foreground\_star`, `background\_cloud`), but if they should share an animation, treat them as a single element.
- Keep the number of elements in a manageable range (e.g., 5-10) so that the animation is not overly complex.
- Avoid using generic or SVG/HTML tag-based names (e.g., `circle`, `rect`, `path`, `body`). Instead, use meaningful identifiers based on position or visual role. Also do not use special characters that could interfere with JSON formatting or directory paths (e.g., `#`, `.` , `/`, `\\`, `:`).
- If an element has no animation, it should be explicitly stated as such.
- Please do not plan accessibility features or interactivity.
- Do not include any runtime-only classes (e.g., .impact, .flight, .play) in your plan. The animation must animate immediately on page load with no manual steps or JS triggers.

Please respond in the following JSON format:

```
```json
{
  element_name_1: Animation plan for element_name_1,
  element_name_2: Animation plan for element_name_2,
  ...
  element_name_n: Animation plan for element_name_n,
}
```

# Animation Planner
